# Supplementary material for: Risk Assessment of Mortality Following Intraoperative Cardiac Arrest Using POSSUM and P-POSSUM in Adults Undergoing Non-Cardiac Surgery
Source: PubMed Central journal article supplement — Yonsei Med J. 2015 Jul 29;56(5):1401–7. doi: 10.3349/ymj.2015.56.5.1401 (PMC4541674; doi:10.3349/ymj.2015.56.5.1401), 2015-07-29
Supplement: ymj-56-1401-s001.pdf [file ymj-56-1401-s001.pdf]

**Supplementary Table 1.** POSSUM Physiological Score

|                                        | Score      |                                                         |                                                               |                                                                                |
|----------------------------------------|------------|---------------------------------------------------------|---------------------------------------------------------------|--------------------------------------------------------------------------------|
|                                        | 1          | 2                                                       | 4                                                             | 8                                                                              |
| Age, yrs                               | ≤60        | 61–70                                                   | ≥71                                                           |                                                                                |
| Cardiac signs (chest radiograph)       | No failure | Diuretic, digoxin, antianginal, or hypertensive therapy | Peripheral edema; warfarin therapy<br>Borderline cardiomegaly | Raised jugular venous pressure<br>Cardiomegaly                                 |
| Respiratory signs (chest radiograph)   | No dyspnea | Dyspnea on exertion<br>Mild COPD                        | Limiting dyspnea<br>Moderate COPD                             | Dyspnea at rest<br>Fibrosis or consolidation                                   |
| Systolic blood pressure, mm Hg         | 110–130    | 131–170<br>100–109                                      | ≥170<br>90–99                                                 | ≤89                                                                            |
| Pulse, beats/min                       | 50–80      | 81–100<br>40–49                                         | 101–120                                                       | ≥121<br>≤39                                                                    |
| Glasgow coma scale                     | 15         | 12–14                                                   | 9–11                                                          | ≤8                                                                             |
| Hemoglobin, g/100 mL                   | 13–16      | 11.5–12.9<br>16.1–17.0                                  | 10.0–11.4<br>17.1–18.0                                        | ≤9.9<br>≥18.1                                                                  |
| White cell count, ×10 <sup>12</sup> /L | 4–10       | 10.1–20.0<br>3.1–4.0                                    | ≥20.1<br>≤3.0                                                 |                                                                                |
| Urea, mmol/L                           | ≤7.5       | 7.6–10.0                                                | 10.1–15.0                                                     | ≥15.1                                                                          |
| Sodium, mmol/L                         | ≥136       | 131–135                                                 | 126–130                                                       | ≤125                                                                           |
| Potassium, mmol/L                      | 3.5–5.0    | 3.2–3.4<br>5.1–5.3                                      | 2.9–3.1<br>5.4–5.9                                            | ≤2.8<br>≥6.0                                                                   |
| Electrocardiogram                      | Normal     |                                                         | Atrial fibrillation (rate 60–90)                              | Any other abnormal rhythm or<br>≥5 ectopics/min<br>Q wave or ST/T wave changes |

COPD, chronic obstructive pulmonary disease; POSSUM, Physiological and Operative Severity Score for enUmeration of Mortality and morbidity.
