# Supplementary material for: Risk Assessment of Mortality Following Intraoperative Cardiac Arrest Using POSSUM and P-POSSUM in Adults Undergoing Non-Cardiac Surgery
Source: PubMed Central journal article supplement — Yonsei Med J. 2015 Jul 29;56(5):1401–7. doi: 10.3349/ymj.2015.56.5.1401 (PMC4541674; doi:10.3349/ymj.2015.56.5.1401), 2015-07-29
Supplement: ymj-56-1401-s002.pdf [file ymj-56-1401-s002.pdf]

**Supplementary Table 2.** POSSUM Operative Severity Score

|                        | Score    |                     |                                                                                 |                                              |
|------------------------|----------|---------------------|---------------------------------------------------------------------------------|----------------------------------------------|
|                        | 1        | 2                   | 4                                                                               | 8                                            |
| Operative severity     | Minor    | Moderate            | Major                                                                           | Major+                                       |
| Multiple procedures    | 1        |                     | 2                                                                               | >2                                           |
| Total blood loss, mL   | ≤100     | 101–500             | 501–999                                                                         | ≥1000                                        |
| Peritoneal soiling     | None     | Minor, serous fluid | Local pus                                                                       | Free bowel content, pus or blood             |
| Presence of malignancy | None     | Primary only        | Nodal metastasis                                                                | Distant metastasis                           |
| Mode of surgery        | Elective |                     | Emergency resuscitation of >2 hrs possible<br>Operation <24 hrs after admission | Emergency<br>Immediate surgery <2 hrs needed |

POSSUM, Physiological and Operative Severity Score for enUmeration of Mortality and morbidity.
